# Supplementary material
Source: publisher figshare collection journal article supplement (https://karger.figshare.com/articles/dataset/_/3452765)
Supplement: Supplementary file 1 [file 2]

# QUESTIONNAIRE QUALITÉ DE VIE - DERMATOLOGIE

Réf. Hôpital :  
Nom :  
Adresse :

Date :  
Diagnostic :

DLQI  
Score :

**Ce questionnaire a pour but d'évaluer l'influence de votre problème de peau sur votre vie AU COURS DES 7 DERNIERS JOURS. Veuillez cocher  une case par question.**

- |     |                                                                                                                                                                                                                        |                                                                                                                                                                              |                                          |
|-----|------------------------------------------------------------------------------------------------------------------------------------------------------------------------------------------------------------------------|------------------------------------------------------------------------------------------------------------------------------------------------------------------------------|------------------------------------------|
| 1.  | Au cours des 7 derniers jours, dans quelle mesure votre peau vous a-t-elle <b>démangé(e), fait souffrir</b> ou <b>brûlé(e)</b> ?                                                                                       | Énormément <input type="checkbox"/><br>Beaucoup <input type="checkbox"/><br>Un peu <input type="checkbox"/><br>Pas du tout <input type="checkbox"/>                          |                                          |
| 2.  | Au cours des 7 derniers jours, dans quelle mesure vous êtes-vous senti(e) <b>gêné(e)</b> ou <b>complexé(e)</b> par votre problème de peau ?                                                                            | Énormément <input type="checkbox"/><br>Beaucoup <input type="checkbox"/><br>Un peu <input type="checkbox"/><br>Pas du tout <input type="checkbox"/>                          |                                          |
| 3.  | Au cours des 7 derniers jours, dans quelle mesure votre problème de peau vous a-t-il gêné(e) pour <b>faire des courses</b> , vous occuper de votre <b>maison</b> ou pour <b>jardiner</b> ?                             | Énormément <input type="checkbox"/><br>Beaucoup <input type="checkbox"/><br>Un peu <input type="checkbox"/><br>Pas du tout <input type="checkbox"/>                          | Non concerné(e) <input type="checkbox"/> |
| 4.  | Au cours des 7 derniers jours, dans quelle mesure votre problème de peau vous a-t-il influencé(e) dans le <b>choix des vêtements</b> que vous portiez ?                                                                | Énormément <input type="checkbox"/><br>Beaucoup <input type="checkbox"/><br>Un peu <input type="checkbox"/><br>Pas du tout <input type="checkbox"/>                          | Non concerné(e) <input type="checkbox"/> |
| 5.  | Au cours des 7 derniers jours, dans quelle mesure votre problème de peau a-t-il affecté vos <b>activités avec les autres</b> ou vos <b>loisirs</b> ?                                                                   | Énormément <input type="checkbox"/><br>Beaucoup <input type="checkbox"/><br>Un peu <input type="checkbox"/><br>Pas du tout <input type="checkbox"/>                          | Non concerné(e) <input type="checkbox"/> |
| 6.  | Au cours des 7 derniers jours, dans quelle mesure avez-vous eu du mal à faire du <b>sport</b> à cause de votre problème de peau ?                                                                                      | Énormément <input type="checkbox"/><br>Beaucoup <input type="checkbox"/><br>Un peu <input type="checkbox"/><br>Pas du tout <input type="checkbox"/>                          | Non concerné(e) <input type="checkbox"/> |
| 7.  | Au cours des 7 derniers jours, votre problème de peau vous a-t-il empêché(e) de <b>travailler</b> ou d' <b>étudier</b> ?                                                                                               | Oui <input type="checkbox"/><br>Non <input type="checkbox"/><br>Beaucoup <input type="checkbox"/><br>Un peu <input type="checkbox"/><br>Pas du tout <input type="checkbox"/> | Non concerné(e) <input type="checkbox"/> |
|     | Si la réponse est « non » : au cours des 7 derniers jours, dans quelle mesure votre problème de peau vous a-t-il gêné(e) dans votre <b>travail</b> ou dans vos <b>études</b> ?                                         |                                                                                                                                                                              |                                          |
| 8.  | Au cours des 7 derniers jours, dans quelle mesure votre problème de peau a-t-il rendu difficiles vos relations avec votre <b>partenaire</b> , vos <b>amis proches</b> ou votre <b>famille</b> ?                        | Énormément <input type="checkbox"/><br>Beaucoup <input type="checkbox"/><br>Un peu <input type="checkbox"/><br>Pas du tout <input type="checkbox"/>                          | Non concerné(e) <input type="checkbox"/> |
| 9.  | Au cours des 7 derniers jours, dans quelle mesure votre problème de peau a-t-il rendu votre <b>vie sexuelle difficile</b> ?                                                                                            | Énormément <input type="checkbox"/><br>Beaucoup <input type="checkbox"/><br>Un peu <input type="checkbox"/><br>Pas du tout <input type="checkbox"/>                          | Non concerné(e) <input type="checkbox"/> |
| 10. | Au cours des 7 derniers jours, dans quelle mesure le <b>traitement</b> que vous utilisez pour votre peau a-t-il été un problème, par exemple parce qu'il prenait trop de votre temps ou qu'il salissait votre maison ? | Énormément <input type="checkbox"/><br>Beaucoup <input type="checkbox"/><br>Un peu <input type="checkbox"/><br>Pas du tout <input type="checkbox"/>                          | Non concerné(e) <input type="checkbox"/> |

**Veuillez vérifier que vous avez bien répondu à CHAQUE question. Merci.**

©AY Finlay, GK Khan, avril 1992 www.dermatology.org.uk, toute reproduction de ce document est interdite sans autorisation des auteurs.

Français pour la Suisse
