# Supplementary material
Source: publisher figshare collection journal article supplement (https://karger.figshare.com/articles/dataset/_/3452765)

## Psoriasis Epidemiology Screening Tool (PEST)

Questionario di screening per l'artrite psoriasica in pazienti affetti da psoriasi

|                                                                                                       | No | Sì |
|-------------------------------------------------------------------------------------------------------|----|----|
| Ha mai riscontrato gonfiore a una o più articolazioni?                                                |    |    |
| Un medico Le ha mai detto che soffre di artrite?                                                      |    |    |
| Le unghie dei suoi piedi o delle sue mani presentano piccoli fori o cavità superficiali?              |    |    |
| Ha mai avuto male al tallone?                                                                         |    |    |
| Le è mai capitato di avere un dito della mano o del piede gonfio e dolente senza un apparente motivo? |    |    |

Nel disegno sottostante, metta un segno di spunta alle **articolazioni** che Le hanno procurato fastidio (ad es. rigidità, gonfiore, dolore articolare):

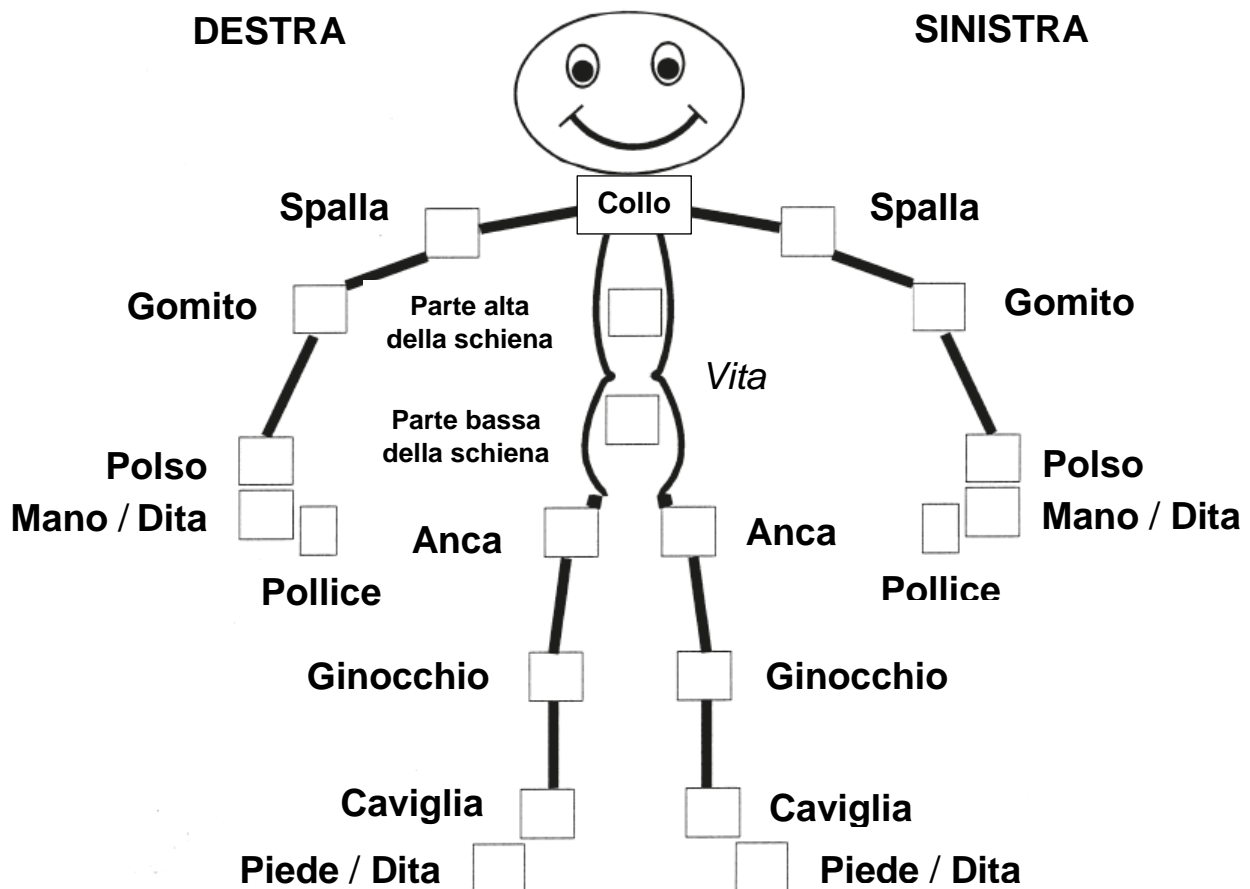

Supplement: Supplementary file 2 [file 2]
