# Supplementary material
Source: publisher figshare collection journal article supplement (https://karger.figshare.com/articles/dataset/_/3452765)
Supplement: Supplementary file 3 [file 2]

# DERMATOLOGISCHER LEBENSQUALITÄTS-FRAGEBOGEN

Spital Nr.:  
Name:  
Adresse:

Datum:  
Diagnose:

DLQI  
Score:

**Ziel dieses Fragebogens ist es herauszufinden, wie sehr Ihre Hauterkrankung Ihr Leben IN DEN VERGANGENEN 7 TAGEN beeinflusst hat. Bitte kreuzen Sie ☒ zu jeder Frage ein Kästchen an.**

- |     |                                                                                                                                                                                                                                                                                                                                          |                                                                                                                                                                                            |                                                    |
|-----|------------------------------------------------------------------------------------------------------------------------------------------------------------------------------------------------------------------------------------------------------------------------------------------------------------------------------------------|--------------------------------------------------------------------------------------------------------------------------------------------------------------------------------------------|----------------------------------------------------|
| 1.  | Wie sehr hat Ihre Haut in den vergangenen 7 Tagen <b>gejuckt</b> , war <b>wund</b> , hat <b>geschmerzt</b> oder <b>gebrannt</b> ?                                                                                                                                                                                                        | Sehr <input type="checkbox"/><br>Ziemlich <input type="checkbox"/><br>Ein bisschen <input type="checkbox"/><br>Überhaupt nicht <input type="checkbox"/>                                    |                                                    |
| 2.  | Wie sehr hat Ihre Hauterkrankung Sie in den vergangenen 7 Tagen <b>verlegen</b> oder <b>befangen</b> gemacht?                                                                                                                                                                                                                            | Sehr <input type="checkbox"/><br>Ziemlich <input type="checkbox"/><br>Ein bisschen <input type="checkbox"/><br>Überhaupt nicht <input type="checkbox"/>                                    |                                                    |
| 3.  | Wie sehr hat Ihre Hauterkrankung Sie in den vergangenen 7 Tagen bei <b>Einkäufen</b> oder bei <b>Haus-</b> oder <b>Gartenarbeit</b> behindert?                                                                                                                                                                                           | Sehr <input type="checkbox"/><br>Ziemlich <input type="checkbox"/><br>Ein bisschen <input type="checkbox"/><br>Überhaupt nicht <input type="checkbox"/>                                    | Frage betrifft mich nicht <input type="checkbox"/> |
| 4.  | Wie sehr hat Ihre Hauterkrankung die Wahl der <b>Kleidung</b> beeinflusst, die Sie in den vergangenen 7 Tagen getragen haben?                                                                                                                                                                                                            | Sehr <input type="checkbox"/><br>Ziemlich <input type="checkbox"/><br>Ein bisschen <input type="checkbox"/><br>Überhaupt nicht <input type="checkbox"/>                                    | Frage betrifft mich nicht <input type="checkbox"/> |
| 5.  | Wie sehr hat Ihre Hauterkrankung in den vergangenen 7 Tagen Ihre <b>Aktivitäten mit anderen Menschen</b> oder Ihre <b>Freizeitgestaltung</b> beeinflusst?                                                                                                                                                                                | Sehr <input type="checkbox"/><br>Ziemlich <input type="checkbox"/><br>Ein bisschen <input type="checkbox"/><br>Überhaupt nicht <input type="checkbox"/>                                    | Frage betrifft mich nicht <input type="checkbox"/> |
| 6.  | Wie sehr hat Ihre Hauterkrankung es Ihnen in den vergangenen 7 Tagen erschwert, <b>sportlich</b> aktiv zu sein?                                                                                                                                                                                                                          | Sehr <input type="checkbox"/><br>Ziemlich <input type="checkbox"/><br>Ein bisschen <input type="checkbox"/><br>Überhaupt nicht <input type="checkbox"/>                                    | Frage betrifft mich nicht <input type="checkbox"/> |
| 7.  | Hat Ihre Hauterkrankung in den vergangenen 7 Tagen dazu geführt, dass Sie Ihrer <b>beruflichen Tätigkeit</b> nicht nachgehen oder nicht <b>studieren</b> konnten?<br><br>Falls "nein", wie sehr ist Ihre Hauterkrankung in den vergangenen 7 Tagen ein Problem bei Ihrer <b>beruflichen Tätigkeit</b> bzw. Ihrem <b>Studium</b> gewesen? | Ja <input type="checkbox"/><br>Nein <input type="checkbox"/><br><br>Ziemlich <input type="checkbox"/><br>Ein bisschen <input type="checkbox"/><br>Überhaupt nicht <input type="checkbox"/> | Frage betrifft mich nicht <input type="checkbox"/> |
| 8.  | Wie sehr hat Ihre Hauterkrankung in den vergangenen 7 Tagen Probleme im Umgang mit Ihrem <b>Partner</b> , <b>Freunden</b> oder <b>Verwandten</b> verursacht?                                                                                                                                                                             | Sehr <input type="checkbox"/><br>Ziemlich <input type="checkbox"/><br>Ein bisschen <input type="checkbox"/><br>Überhaupt nicht <input type="checkbox"/>                                    | Frage betrifft mich nicht <input type="checkbox"/> |
| 9.  | Wie sehr hat Ihre Hauterkrankung in den vergangenen 7 Tagen Ihr <b>Liebesleben</b> beeinträchtigt?                                                                                                                                                                                                                                       | Sehr <input type="checkbox"/><br>Ziemlich <input type="checkbox"/><br>Ein bisschen <input type="checkbox"/><br>Überhaupt nicht <input type="checkbox"/>                                    | Frage betrifft mich nicht <input type="checkbox"/> |
| 10. | Inwieweit war die <b>Behandlung</b> Ihrer Haut in den vergangenen 7 Tagen für Sie mit Problemen verbunden (z. B. weil die Behandlung Zeit in Anspruch nahm oder dadurch Ihr Haushalt unsauber wurde)?                                                                                                                                    | Sehr <input type="checkbox"/><br>Ziemlich <input type="checkbox"/><br>Ein bisschen <input type="checkbox"/><br>Überhaupt nicht <input type="checkbox"/>                                    | Frage betrifft mich nicht <input type="checkbox"/> |

**Bitte prüfen Sie, ob Sie wirklich ALLE Fragen beantwortet haben. Vielen Dank!**
