# Supplementary material
Source: publisher figshare collection journal article supplement (https://karger.figshare.com/articles/dataset/_/3452765)
Supplement: Supplementary file 4 [file 2]

Archive with 11 entries (11 files):
- DLQI-English-UK.pdf
- DLQI-French-Switzerland.pdf
- DLQI-German- Switzerland.pdf
- DLQI-Italian-Switzerland.pdf
- Legende zu Supplementary Figure 1.doc
- Microsoft Excel sheet with PASI  PrecisePASI BSA  NAPSI  PPPASI calculator.xls
- PEST Assessment_de.pdf
- PEST Assessment_en.pdf
- PEST Assessment_fr.pdf
- PEST Assessment_it.pdf
- Supplementary Figure 1_NEW.pdf
