# Supplementary material
Source: publisher figshare collection journal article supplement (https://karger.figshare.com/articles/dataset/_/3452765)
Supplement: Supplementary file 4 [file 2 › DLQI-Italian-Switzerland.pdf]

## QUESTIONARIO DERMATOLOGICO SULLA QUALITÀ DELLA VITA

N° ospedale:  
Nome del paziente:  
Indirizzo del paziente:

Data:  
Diagnosi:

Punteggio: **DLQI**

**Lo scopo del questionario è di misurare quanto i suoi problemi alla pelle hanno influito sulla sua vita NEGLI ULTIMI 7 GIORNI. La preghiamo di fare una crocetta ☒ su una sola casella per ogni domanda.**

- |     |                                                                                                                                                                       |                                                                                                                                                                            |                                                   |
|-----|-----------------------------------------------------------------------------------------------------------------------------------------------------------------------|----------------------------------------------------------------------------------------------------------------------------------------------------------------------------|---------------------------------------------------|
| 1.  | Negli ultimi 7 giorni, ha avuto <b>prurito, indolenzimento, dolore o sensazioni di bruciore</b> alla pelle?                                                           | Moltissimo <input type="checkbox"/><br>Molto <input type="checkbox"/><br>Un po' <input type="checkbox"/><br>Per niente <input type="checkbox"/>                            |                                                   |
| 2.  | Negli ultimi 7 giorni, si è sentito/a <b>imbarazzato/a</b> o a <b>disagio</b> a causa dei suoi problemi alla pelle?                                                   | Moltissimo <input type="checkbox"/><br>Molto <input type="checkbox"/><br>Un po' <input type="checkbox"/><br>Per niente <input type="checkbox"/>                            |                                                   |
| 3.  | Negli ultimi 7 giorni, i suoi problemi alla pelle le hanno creato fastidi per <b>fare la spesa</b> , occuparsi della <b>casa</b> o del <b>giardino</b> )?             | Moltissimo <input type="checkbox"/><br>Molto <input type="checkbox"/><br>Un po' <input type="checkbox"/><br>Per niente <input type="checkbox"/>                            | Non riguarda il mio caso <input type="checkbox"/> |
| 4.  | Negli ultimi 7 giorni, i suoi problemi alla pelle hanno influenzato la scelta dei <b>vestiti</b> da indossare?                                                        | Moltissimo <input type="checkbox"/><br>Molto <input type="checkbox"/><br>Un po' <input type="checkbox"/><br>Per niente <input type="checkbox"/>                            | Non riguarda il mio caso <input type="checkbox"/> |
| 5.  | Negli ultimi 7 giorni, i suoi problemi alla pelle hanno influito sulle sue <b>attività con altre persone</b> o di <b>tempo libero</b> ?                               | Moltissimo <input type="checkbox"/><br>Molto <input type="checkbox"/><br>Un po' <input type="checkbox"/><br>Per niente <input type="checkbox"/>                            | Non riguarda il mio caso <input type="checkbox"/> |
| 6.  | Negli ultimi 7 giorni, i suoi problemi alla pelle le hanno reso difficile praticare <b>sport</b> ?                                                                    | Moltissimo <input type="checkbox"/><br>Molto <input type="checkbox"/><br>Un po' <input type="checkbox"/><br>Per niente <input type="checkbox"/>                            | Non riguarda il mio caso <input type="checkbox"/> |
| 7.  | Negli ultimi 7 giorni, i suoi problemi alla pelle le hanno impedito di <b>lavorare</b> o di <b>studiare</b> ?                                                         | Sì <input type="checkbox"/><br>No <input type="checkbox"/><br><br>Molto <input type="checkbox"/><br>Un po' <input type="checkbox"/><br>Per niente <input type="checkbox"/> | Non riguarda il mio caso <input type="checkbox"/> |
|     | Se ha risposto "No": negli ultimi 7 giorni, i suoi problemi alla pelle le hanno creato difficoltà nel <b>lavoro</b> o nello <b>studio</b> ?                           |                                                                                                                                                                            |                                                   |
| 8.  | Negli ultimi 7 giorni, i suoi problemi alla pelle le hanno creato difficoltà con il/la suo/a <b>compagno/a</b> , con gli <b>amici intimi</b> o con i <b>parenti</b> ? | Moltissimo <input type="checkbox"/><br>Molto <input type="checkbox"/><br>Un po' <input type="checkbox"/><br>Per niente <input type="checkbox"/>                            | Non riguarda il mio caso <input type="checkbox"/> |
| 9.  | Negli ultimi 7 giorni, i suoi problemi alla pelle le hanno creato <b>difficoltà di carattere sessuale</b> ?                                                           | Moltissimo <input type="checkbox"/><br>Molto <input type="checkbox"/><br>Un po' <input type="checkbox"/><br>Per niente <input type="checkbox"/>                            | Non riguarda il mio caso <input type="checkbox"/> |
| 10. | Negli ultimi 7 giorni, la <b>cura</b> per la pelle le ha dato problemi, per esempio portandole via del tempo o creando disordine in casa?                             | Moltissimo <input type="checkbox"/><br>Molto <input type="checkbox"/><br>Un po' <input type="checkbox"/><br>Per niente <input type="checkbox"/>                            | Non riguarda il mio caso <input type="checkbox"/> |

**La preghiamo di controllare di aver risposto ad OGNI domanda. Grazie.**

©AY Finlay, GK Khan, Aprile 1992 [www.dermatology.org.uk](http://www.dermatology.org.uk). Questo documento non deve essere copiato senza il consenso degli autori.

Italian for Switzerland
