# Supplementary material
Source: publisher figshare collection journal article supplement (https://karger.figshare.com/articles/dataset/_/3452765)
Supplement: Supplementary file 4 [file 2 › Microsoft Excel sheet with PASI PrecisePASI BSA NAPSI PPPASI calculator.xls]

## Sheet: PASI & PrecisePASI
PrecisePASI and PASI score calculator
Severity Score		Head	Trunk	Arms	Legs
Erythema (0-4, see below)		0	0	0	0
Infiltration (0-4, see below)		0	0	0	0
Scaling (0-4, see below)		0	0	0	0
Sum of severity scores		0	0	0	0
Surface involvement		Head	Trunk	Arms	Legs
Enter surface in percentage of area		0	0	0	0
PASI =		0	dated	2016-04-12
PrecisePASI =		0	dated	2016-04-12
BSA =		0	dated	2016-04-12
Severity:	0=none	1=slight	2=intermediate
	3=pronounced	4=severe
Calculations:
Precise area classification:		0	0	0	0
Total (Severity x surface)		0	0	0	0
Weighting		x 0.10	x 0.30	x 0.20	x 0.40
per body region		0	0	0	0
Normal area classification:		0	0	0	0
Total (Severity x surface)		0	0	0	0
Weighting		x 0.10	x 0.30	x 0.20	x 0.40
per body region		0	0	0	0
Severe psoriasis--oral therapy with a new retinoid.
Fredriksson T, Pettersson U.
Dermatologica. 1978;157(4):238-44.
Detection of Small Changes in Psoriasis Intensity with PrecisePASI.
Kolios AG, French LE, Navarini AA.
Dermatology. 2015;230(4):314-7.

## Sheet: NAPSI
NAIL Psoriasis Severity Index (NAPSI)
The target nail is graded for nail matrix psoriasis and nail bed psoriasis
The sum of these two scores is the total score for that nail.
Nail Matrix Psoriasis consists of any of the following:							Nail Bed Psoriasis consists of any of the following:
Pitting							Onycholysis
Leukonychia							Splinter hemorrhages
Red spots in the lunula							Oil drop (salmon patch) discoloration
Nail plate crumbling							Nail bed hyperkeratosis
Score for nail matrix psoriasis:							Score for nail bed psoriasis:
0 = none							0 = none
1 = present in 1 quadrant of the nail							1 = present in 1 quadrant of the nail
2 = present in 2 quadrants of the nail							2 = present in 2 quadrants of the nail
3 = present in 3 quadrants of the nail							3 = present in 3 quadrants of the nail
4 = present in 4 quadrants of the nail							4 = present in 4 quadrants of the nail
NAPSI Calculation (Maximum: 80 for hands, 160 for hands and feet)
	R Hand					L Hand
	V	IV	III	II	I	I	II	III	IV	V
Matrix	4	2	2	2	0	0	0	0	2	4
Nail bed	2	4	4	4	0	0	0	0	2	4
	NAPSI =					36
Nail Psoriasis Severity Index: a useful tool for evaluation of nail psoriasis.
Rich P, Scher RK.
J Am Acad Dermatol. 2003 Aug;49(2):206-12.

## Sheet: PPPASI
PPPASI (palmoplantar psoriasis area and severity index)
Severity Score		right hand	left hand	right foot	left foot
Erythema (0-4, see below)		0	0	0	0
Pustules (0-4, see below)		0	0	0	0
Desquamation (0-4, see below)		0	0	0	0
Sum of severity scores		0	0	0	0
Surface involvement		right hand	left hand	right foot	left foot
Enter surface in percentage of area		0	0	0	0
PPPASI =		0	dated	2016-04-12
Calculation	0	1	2	3	4	5	6
Erythema (E)	None	Slight	Moderate	Severe	Very Severe	-	-
Pustules (P)	None	Slight	Moderate	Severe	Very Severe	-	-
Desquamation (D)	None	Slight	Moderate	Severe	Very Severe	-	-
Area affected (%)	0	10	10<30	30<50	50<70	70<90	90-100
Calculation	(E+P+D) * Area * 0.2 (rechte Hand) + (E+P+D) * Area * 0.2 (linke Hand) + (E+P+D) * Area * 0.3 (rechter Fuss) + (E+P+D) * Area * 0.3 (linker Fuss)
