# Supplementary material
Source: publisher figshare collection journal article supplement (https://karger.figshare.com/articles/dataset/_/3452765)

# Psoriasis Epidemiology Screening Tool (PEST)

Ein Screening-Fragebogen zur Psoriasisarthritis bei Psoriasis-Patienten

|                                                                                                                                | Nein | Ja |
|--------------------------------------------------------------------------------------------------------------------------------|------|----|
| Hatten Sie jemals ein geschwollenes Gelenk (oder Gelenke)?                                                                     |      |    |
| Hat Ihnen jemals ein Arzt gesagt, dass Sie an Arthritis leiden?                                                                |      |    |
| Haben Sie Fingernägel oder Zehennägel mit Löchern oder Einbuchtungen?                                                          |      |    |
| Hatten Sie schon einmal Schmerzen in Ihrer Ferse?                                                                              |      |    |
| Hatten Sie schon einmal einen Finger oder eine Zehe, die ohne ersichtlichen Grund vollständig geschwollen und schmerzhaft war? |      |    |

Bitte kreuzen Sie auf der Zeichnung unten die **Gelenke** an, die Ihnen Probleme bereitet haben (d. h. steife, geschwollene oder schmerzhaft Gelenke):

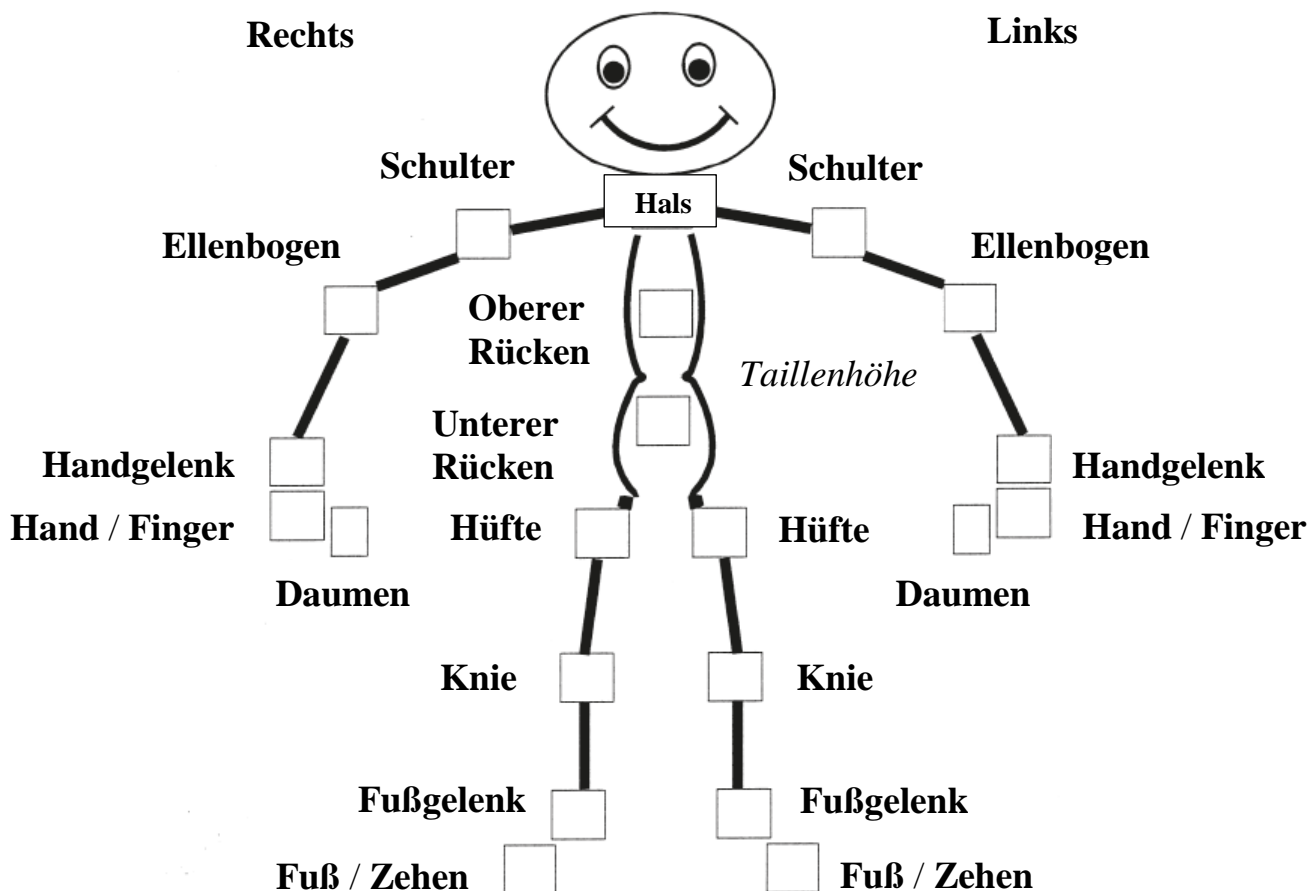

Supplement: Supplementary file 4 [file 2 › PEST Assessment_de.pdf]
