# Supplementary material
Source: publisher figshare collection journal article supplement (https://karger.figshare.com/articles/dataset/_/3452765)

# Psoriasis Epidemiology Screening Tool (PEST)

Screening questionnaire for psoriasis arthritis in psoriatic patients

|                                                                                              | No | Yes |
|----------------------------------------------------------------------------------------------|----|-----|
| Have you ever had a swollen joint (or joints)?                                               |    |     |
| Has a doctor ever told you that you have arthritis?                                          |    |     |
| Do your finger nails or toe nails have holes or pits?                                        |    |     |
| Have you had pain in your heel?                                                              |    |     |
| Have you had a finger or toe that was completely swollen and painful for no apparent reason? |    |     |

In the drawing below, please tick the **joints** that have caused you discomfort (i.e., stiff, swollen, or painful joints):

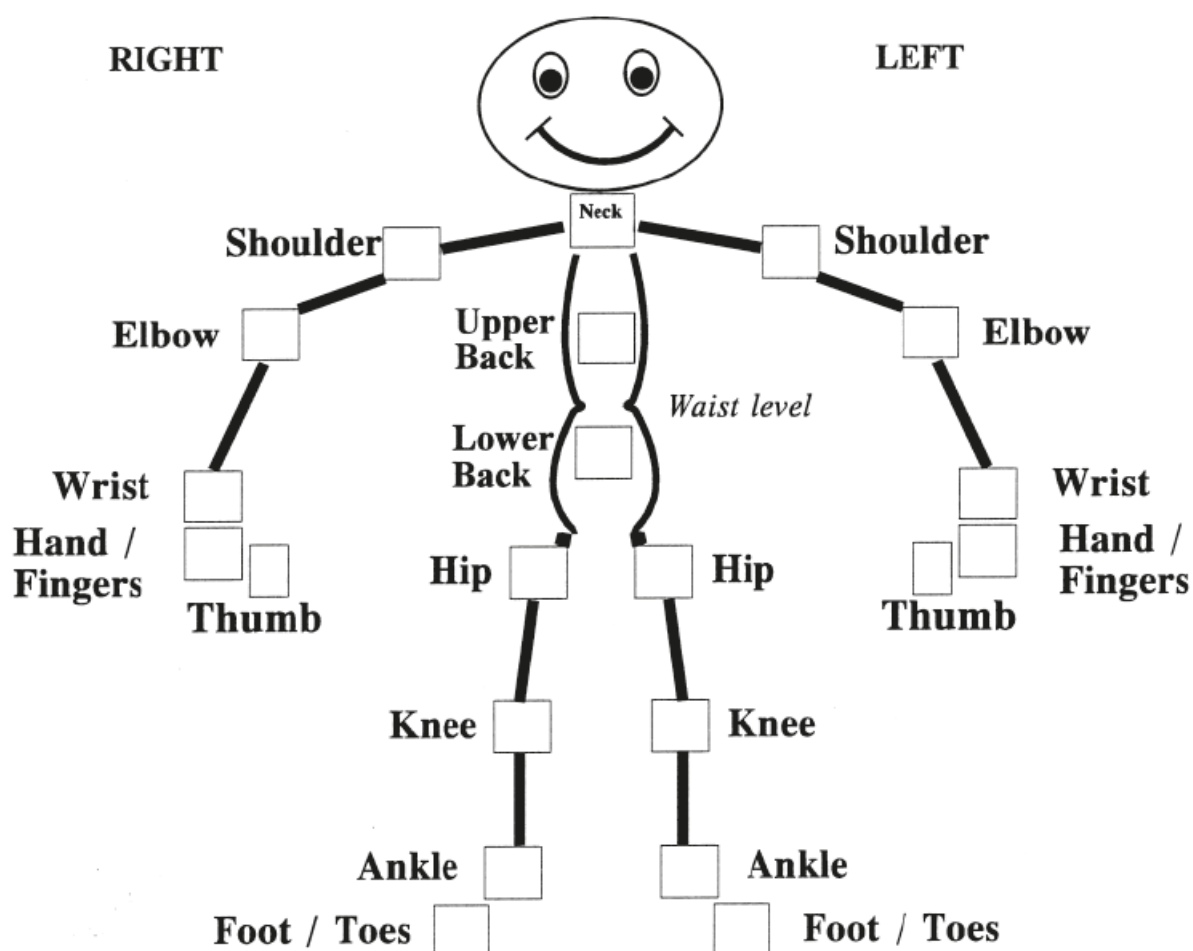

Supplement: Supplementary file 4 [file 2 › PEST Assessment_en.pdf]
