# Supplementary material
Source: publisher figshare collection journal article supplement (https://karger.figshare.com/articles/dataset/_/3452765)

## Psoriasis Epidemiology Screening Tool (PEST)

Questionnaire de dépistage de l'arthrite psoriasique chez les patients atteints de psoriasis

|                                                                                                 | Non | Oui |
|-------------------------------------------------------------------------------------------------|-----|-----|
| Avez-vous déjà eu une articulation gonflée (ou des articulations) ?                             |     |     |
| Votre médecin vous a-t-il déjà dit que vous aviez de l'arthrite ?                               |     |     |
| Vos ongles, des mains ou des pieds, présentent-ils des trous ou des petites cavités ?           |     |     |
| Avez-vous ressenti des douleurs dans vos talons ?                                               |     |     |
| Avez-vous déjà eu un doigt ou un orteil totalement gonflé et douloureux sans raison apparente ? |     |     |

Sur le schéma ci-dessous, veuillez s'il vous plaît cocher les **articulations** qui vous ont causé une gêne (c'est-à-dire, raides, gonflées ou douloureuses) :

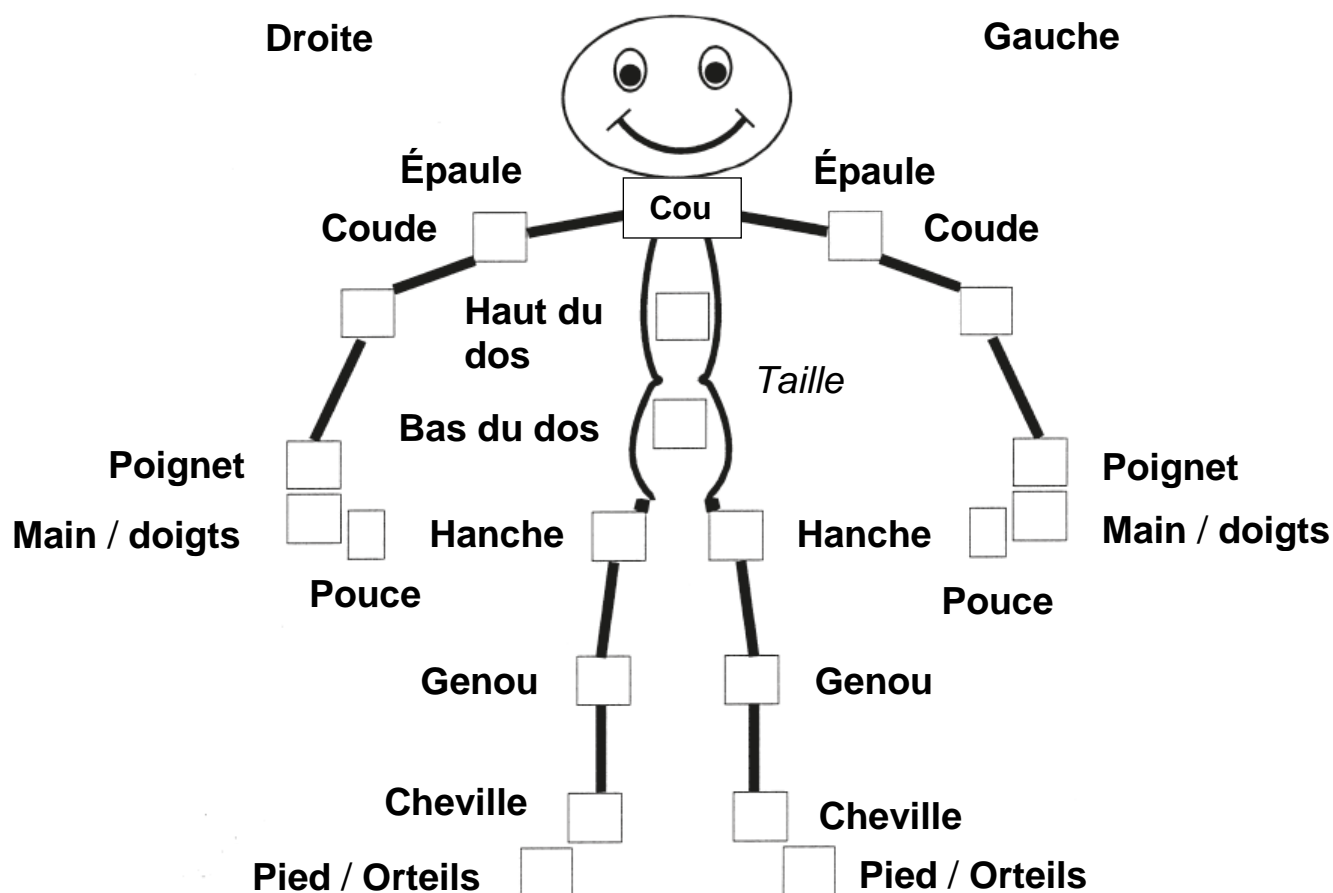

Supplement: Supplementary file 4 [file 2 › PEST Assessment_fr.pdf]
