# Supplementary material
Source: publisher figshare collection journal article supplement (https://karger.figshare.com/articles/dataset/_/3452765)

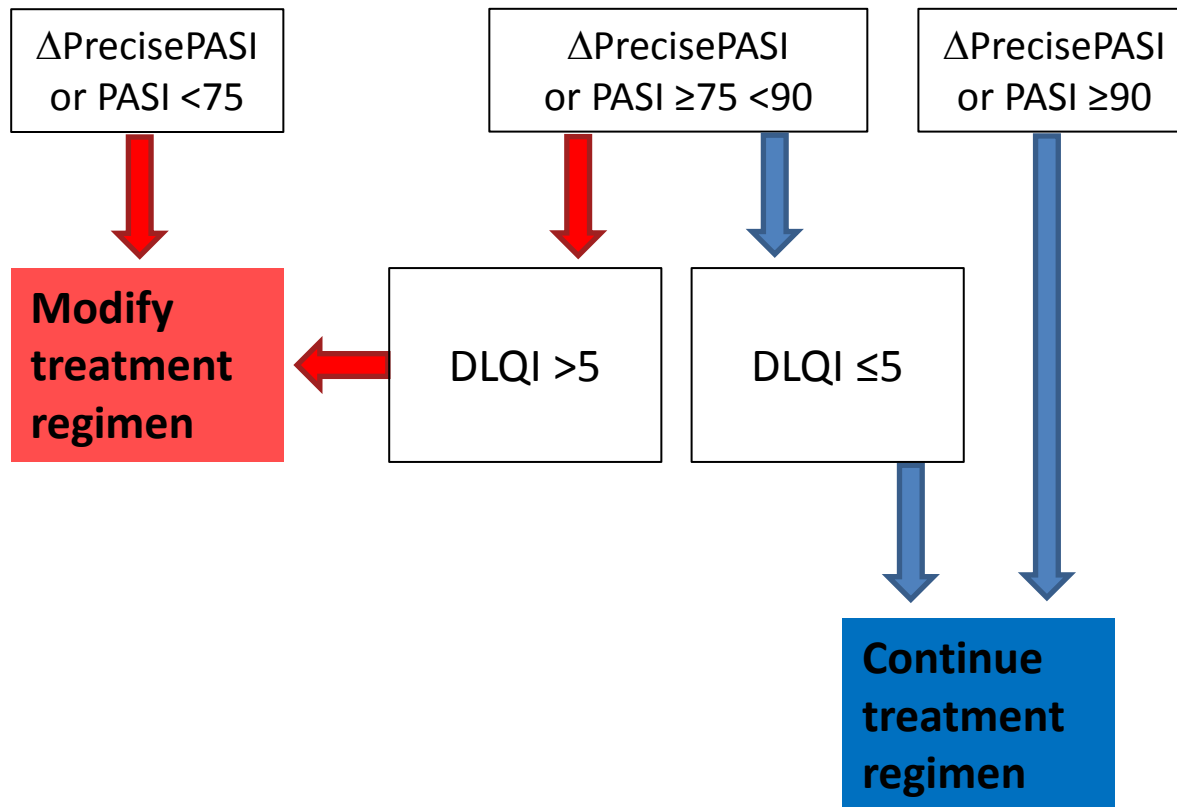

Supplement: Supplementary file 4 [file 2 › Supplementary Figure 1_NEW.pdf]
